# Supplementary material for: Crystal surface defects as possible origins of cocrystal dissociation
Source: Royal Society of Chemistry journal article supplement (doi:10.1039/d2ce00166g), 2022-01-01
Supplement: d2ce00166g1.pdf [file d2ce00166g1.pdf]

## Electronic Supplementary Information (ESI)

### **Crystal surface defects as possible origins of cocrystal dissociation**

Mark D. Eddleston,<sup>a</sup> Ernest H. H. Chow,<sup>a</sup> Dejan-Krešimir Bučar<sup>b</sup> and Ranjit Thakuria<sup>a,c,\*</sup>

<sup>a</sup> Yusuf Hamied Department of Chemistry, University of Cambridge, Lensfield Road, Cambridge CB2 1EW, United Kingdom

<sup>b</sup> Department of Chemistry, University College London, 20 Gordon Street, London WC1H 0AJ, United Kingdom.

<sup>c</sup> Department of Chemistry, Gauhati University, Guwahati 781014, Assam, India;  
\*E-mail: ranjit.thakuria@gauhati.ac.in

#### **1. Experimental section**

Samples were analysed using a Nanoscope Multimode AFM (Veeco Instruments, Cambridge, UK). Samples were imaged in air under ambient conditions using intermittent contact mode with a J scanner (180  $\mu\text{m}^2$  maximum scan size), together with MikroMasch NSC15 SPM probes which had a typical force constant of 40  $\text{Nm}^{-1}$  and tip radius of 10 nm (MikroMasch, 2008). The tapping force which was applied to the probe while imaging was kept to a minimum to prevent the tip from damaging the sample surface. The typical scan area was 5  $\mu\text{m}^2$  (resolution of 256 lines), recorded at a scan rate of 1 Hz per line. Images were processed using Nanoscope Analysis v1.40 and a first order flattening correction was applied.

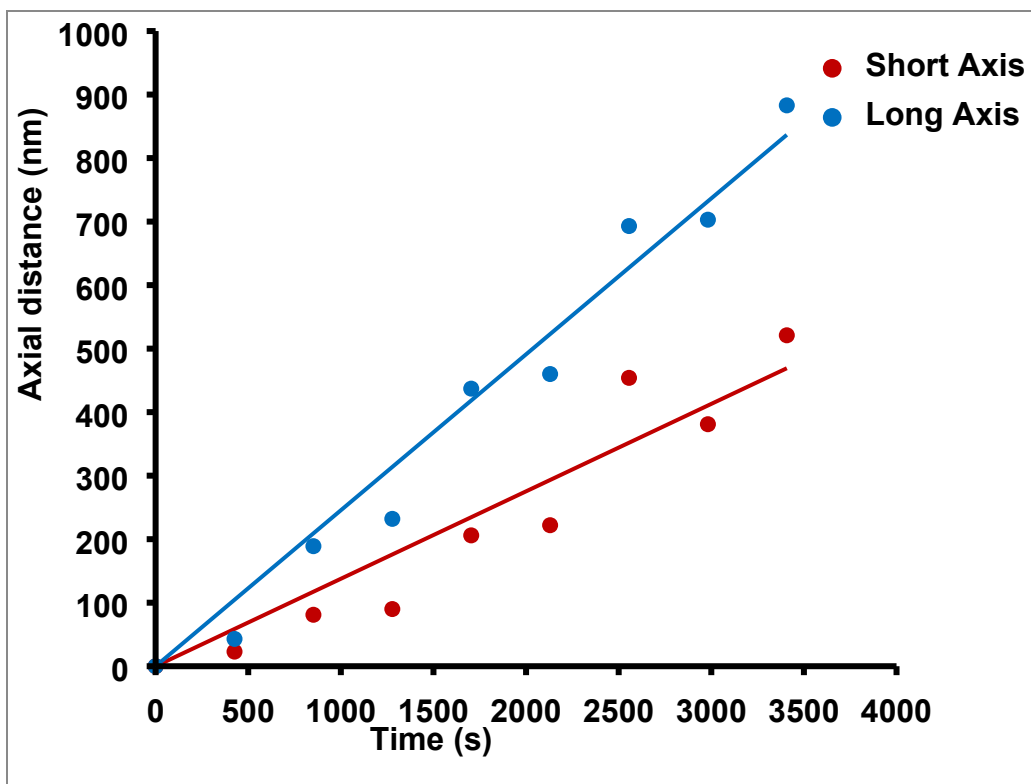

**Figure S1.** Axial distance (nm, y-axis) vs. time (s, x-axis) during molecular diffusion across the four faces with different rate at 0 % RH.

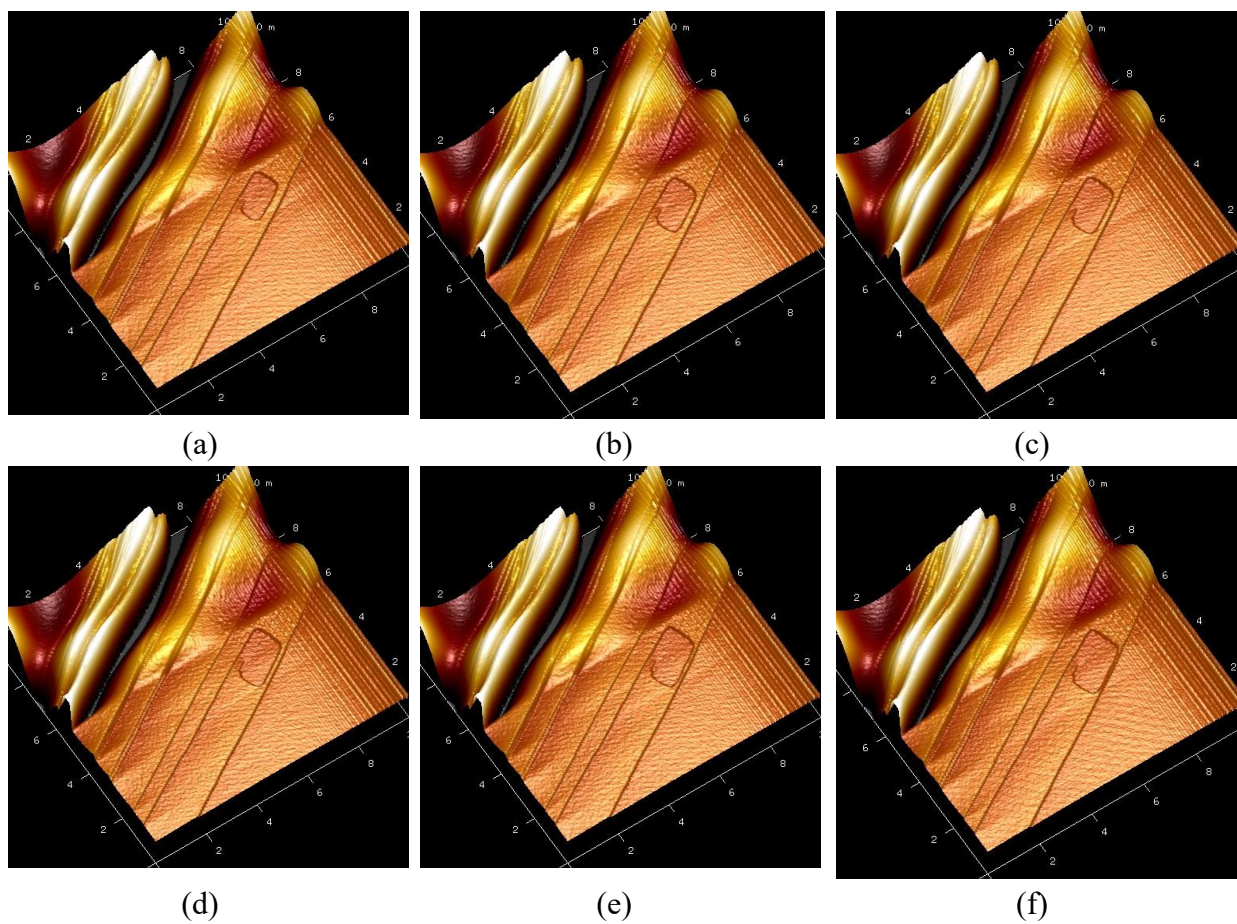

**Figure S2.** IC-AFM height images of Form II (Area 1) at 40% humidity. Screw dislocation inducing molecular diffusion can be observed as the rectangular groove across the surface.

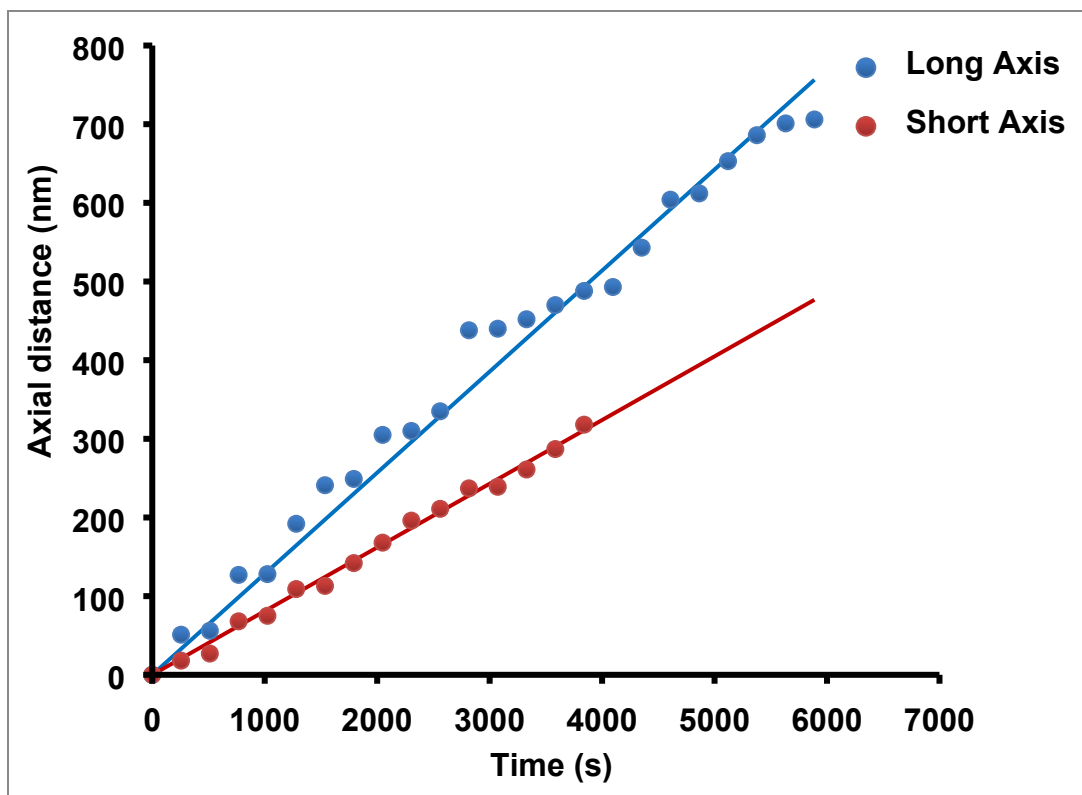

**Figure S3.** Axial distance (nm, y-axis) vs. time (s, x-axis) during molecular diffusion across the four faces with different rate (Area 1) at 40% humidity.

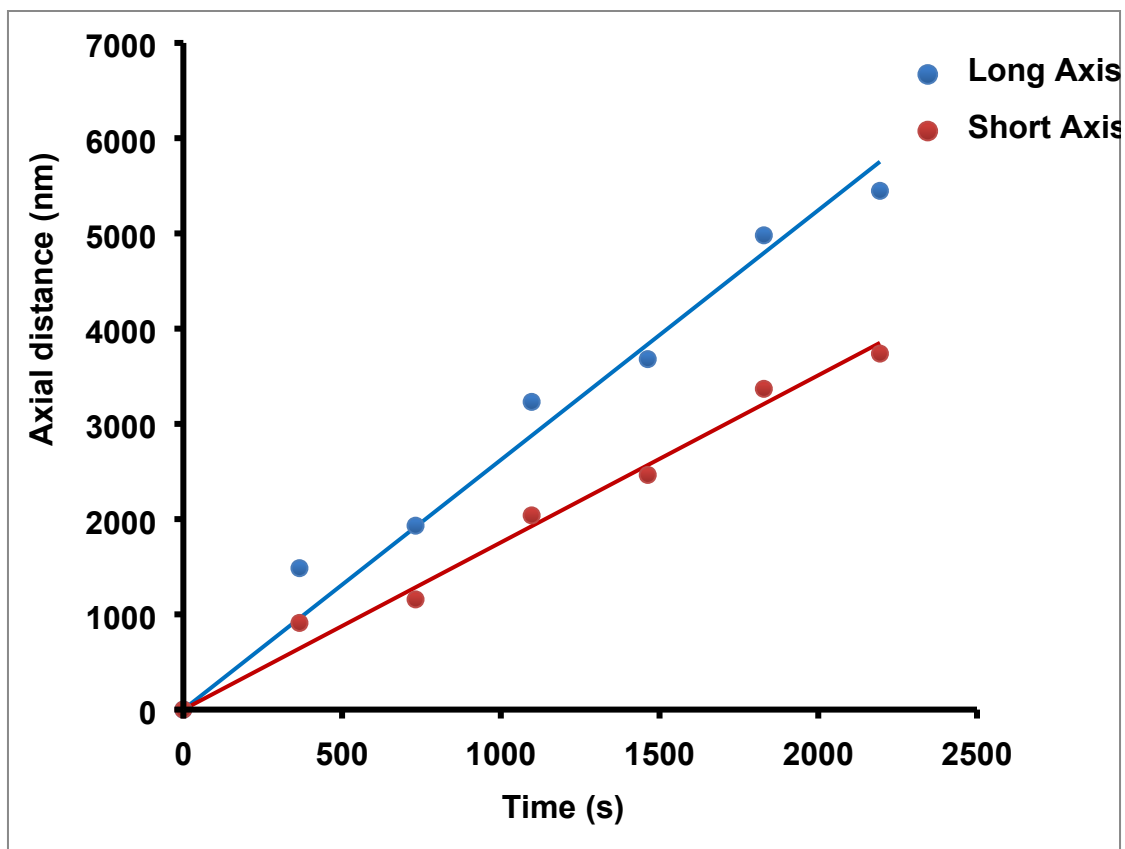

**Figure S4.** Axial distance (nm, y-axis) vs. time (s, x-axis) during crystal growth across the four faces with different growth rate (Area 3) at 40% RH.

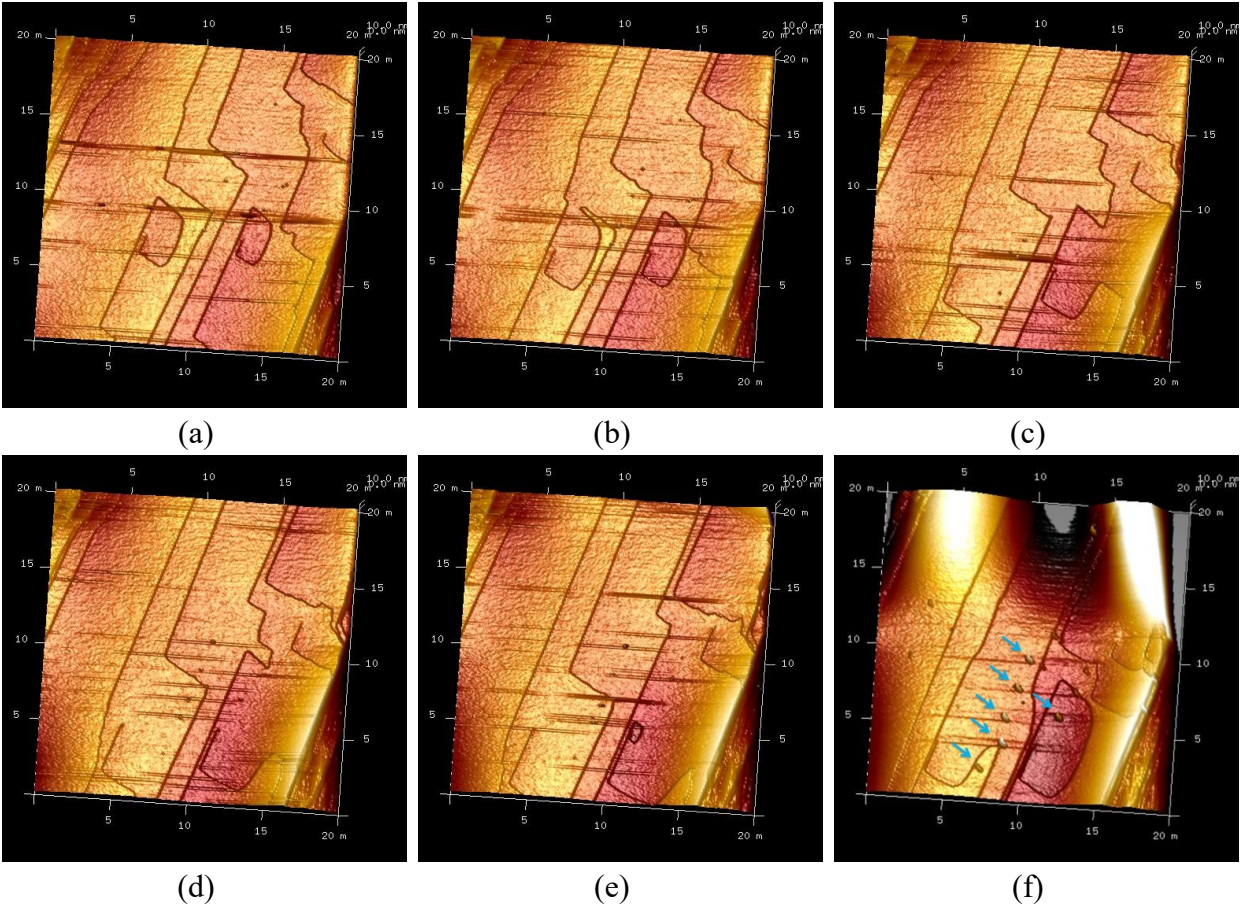

**Figure S5.** IC-AFM height images of Form II (Area 4) at 70% RH show two screw dislocation sites. White protrusions observed in image (f) are deposition of caffeine hydrate needles (blue cursor) on crystal surface based on our previous report.<sup>1,2</sup>

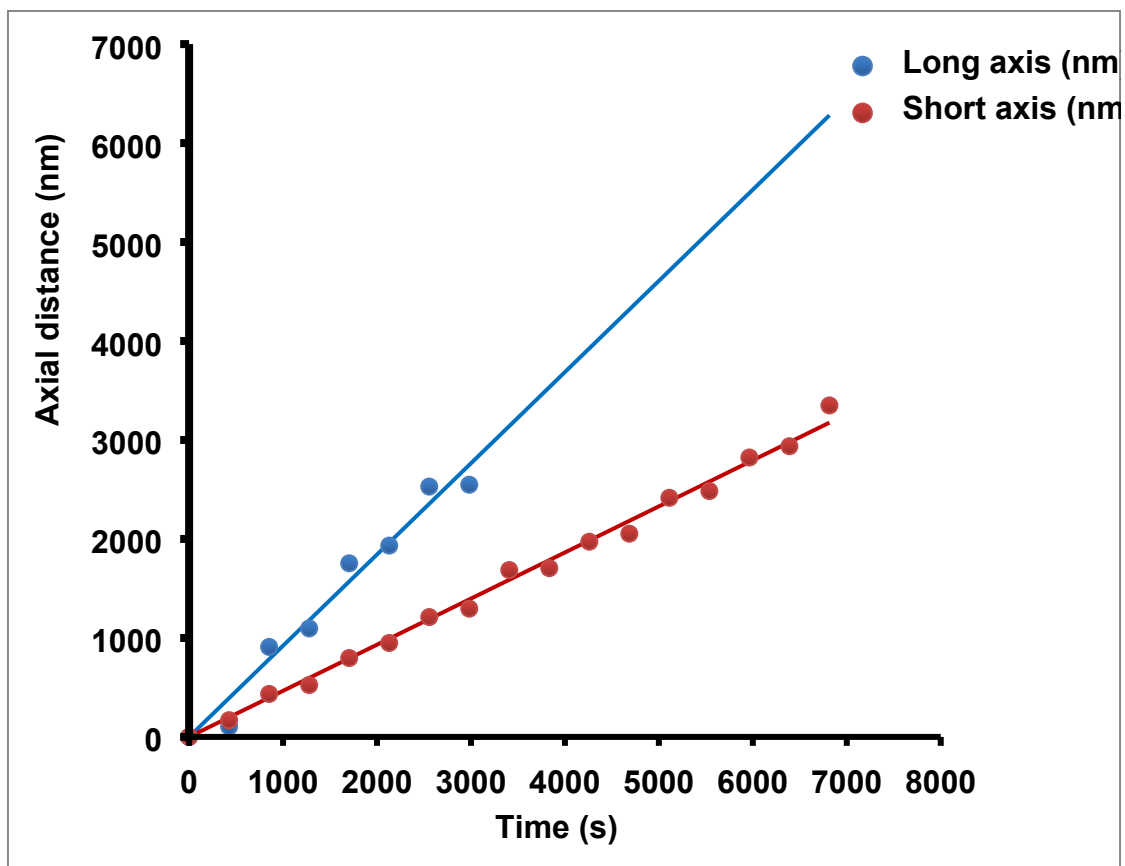

**Figure S6.** Axial distance (nm, y-axis) vs. time (s, x-axis) during molecular diffusion across the four faces (Area 4) with different rate at 70% RH (Upper layer, 1<sup>st</sup> unit).

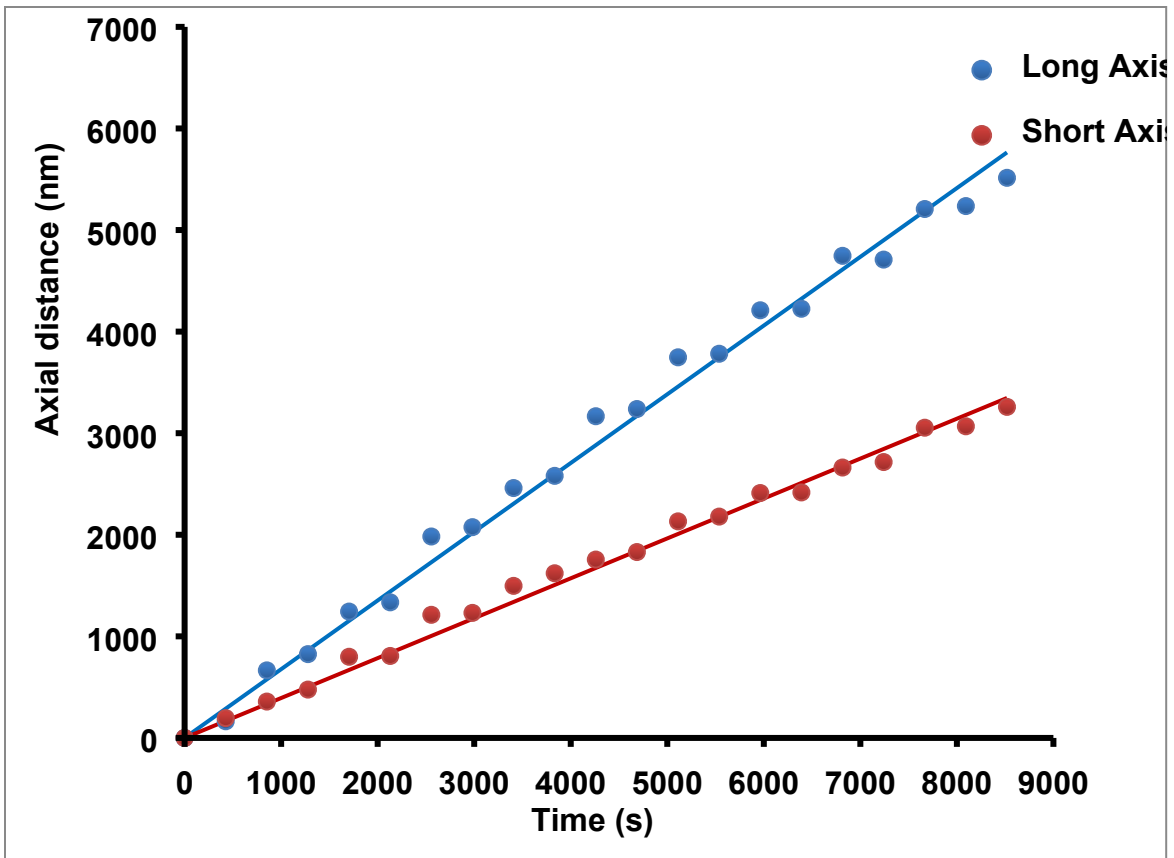

**Figure S7.** Axial distance (nm, y-axis) vs. time (s, x-axis) during molecular diffusion across the four faces with different rate at 70% RH (Upper layer, 2<sup>nd</sup> unit beneath the 1<sup>st</sup> unit).



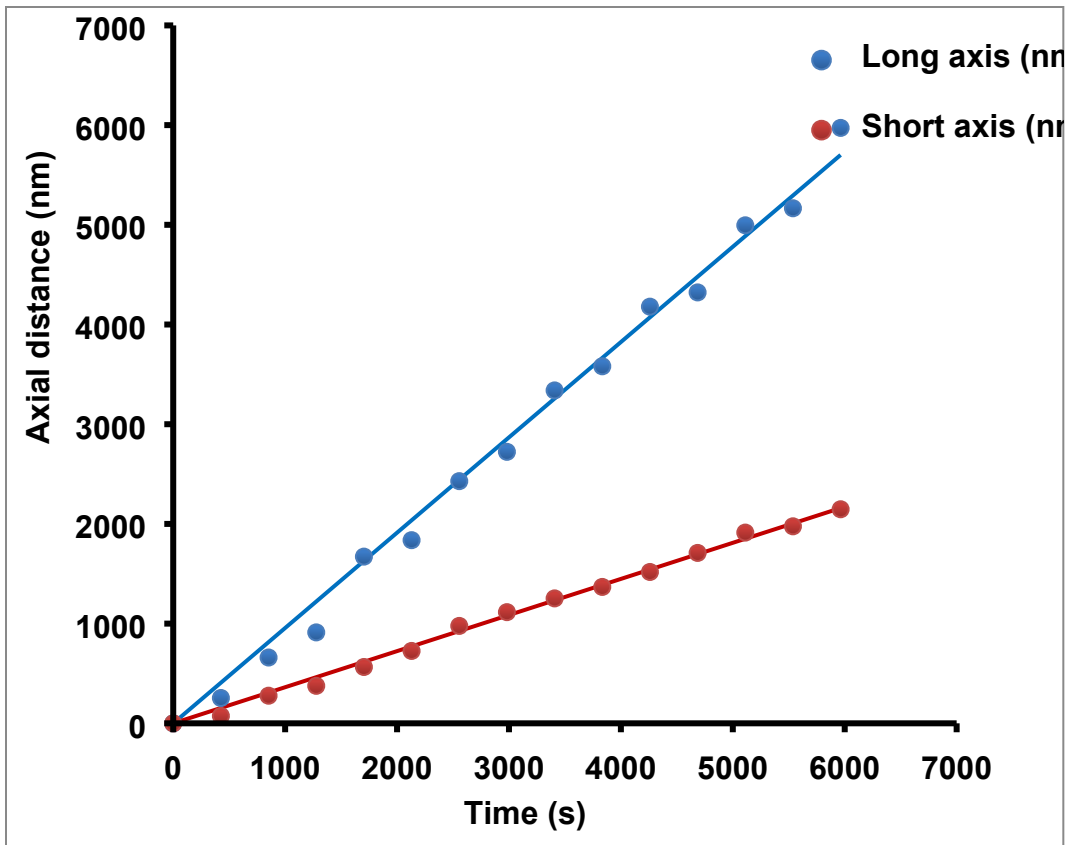

**Figure S8.** Axial distance (nm, y-axis) vs. time (s, x-axis) during molecular diffusion across the four faces with different rate at 70% RH (lower layer, 1<sup>st</sup> unit).

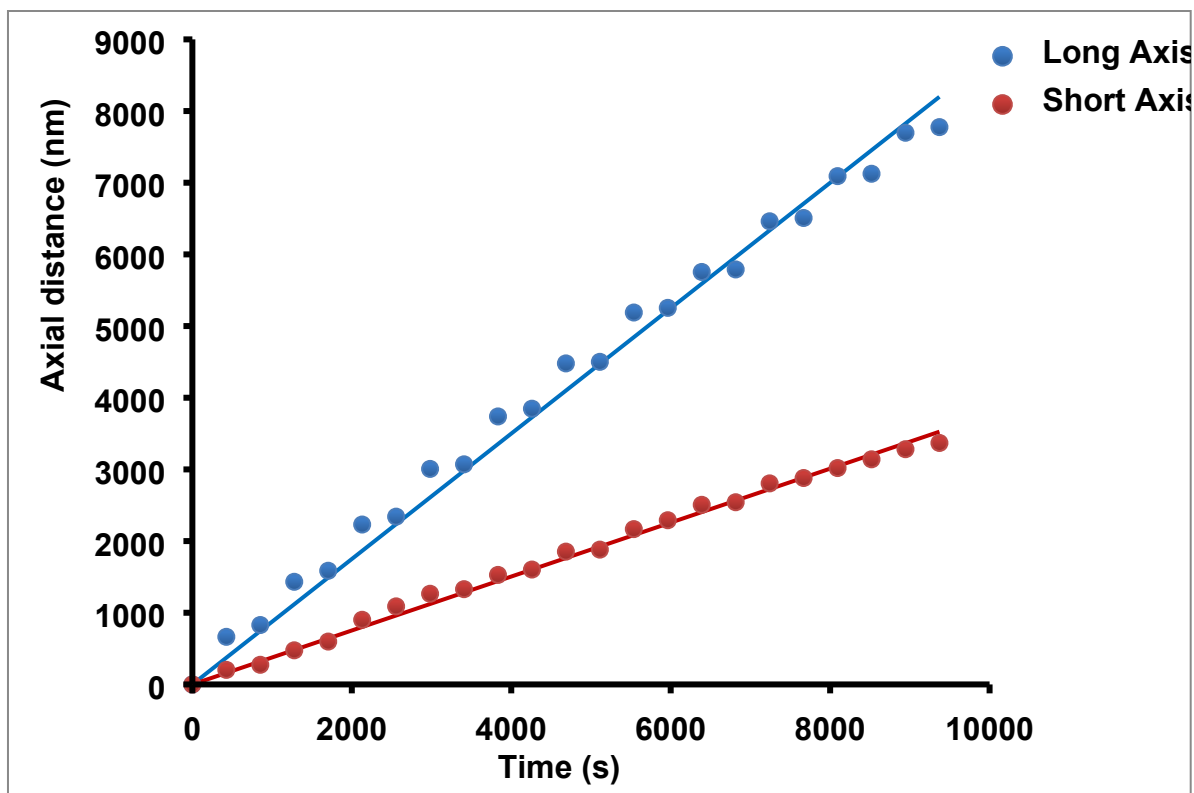

**Figure S9.** Axial distance (nm, y-axis) vs. time (s, x-axis) during molecular diffusion across the four faces with different rate at 70% RH (lower layer, 2<sup>nd</sup> unit beneath the 1<sup>st</sup> unit).

## Reference

1. R. Thakuria, M. D. Eddleston, E. H. H. Chow, L. J. Taylor, B. J. Aldous, J. F. Krzyzaniak and W. Jones, *CrystEngComm*, 2016, **18**, 5296-5301.
2. R. Thakuria, M. Arhangelskis, M. D. Eddleston, E. H. H. Chow, K. K. Sarmah, B. J. Aldous, J. F. Krzyzaniak and W. Jones, *Org. Process Res. Dev.*, 2019, **23**, 845-851.
