# Supplementary material for: Crystal surface defects as possible origins of cocrystal dissociation
Source: Royal Society of Chemistry journal article supplement (doi:10.1039/d2ce00166g), 2022-01-01
Supplement: d2ce00166g2.xlsx [file d2ce00166g2.xlsx]

## Sheet: Sheet1
Frame	Time		Second		Long axis(MicroM)		Short axis (MicroM)		ratio	Long axis(nm)		Short axis (nm)		Area (sq. nm)	Volume (nm3)	A3	molecular weight (amu)		Molecular weight in mg
16	00:00:00		0		2.277		1.625		0	0		0		0	0	0	0		0				1.66053886 × 10-21
17	00:07:06.667000		365.714		2.428		1.637			151		12		1812	19026	26012	8.48796e+06		1.40946e-05				10
18	00:14:13.333000		731.429		2.479		1.714		2.26966	202		89		17978	188769	258081	8.42144e+07		0.000139841				-21
19	00:21:20		1097.14		2.639		1.785		2.2625	362		160		57920	608160	831464	2.71315e+08		0.000450529
20	00:28:26.667000		1462.86		2.746		1.788		2.8773	469		163		76447	802694	1.09743e+06	3.58101e+08		0.000594641
21	00:35:33.333000		1828.57		2.835		1.89		2.10566	558		265		147870	1552635	2.12273e+06	6.92668e+08		0.0011502
22	00:42:40		2194.29		2.955		2.001		1.80319	678		376		254928	2676744	3.65959e+06	1.19416e+09		0.00198295
23	00:49:46.667000		2560		3.116		2.006		2.2021	839		381		319659	3.35642e+06	4.58883e+06	1.49738e+09		0.00248646
24	00:56:53.333000		2925.71		3.174		2.134		1.76228	897		509		456573	4.79402e+06	6.55428e+06	2.13873e+09		0.00355144
25	01:04:00		3291.43		3.285		2.196		1.76532	1008		571		575568	6043464	8.2625e+06	2.69614e+09		0.00447704
26	01:11:06.667000		3657.14		3.342		2.235		1.7459	1065		610		649650	6821325	9.32597e+06	3.04316e+09		0.00505328
27	01:18:13.333000		4022.86		3.45		2.31		1.71241	1173		685		803505	8.4368e+06	1.15346e+07	3.76386e+09		0.00625004
28	01:25:20		4388.57		3.607		2.403		1.70951	1330		778		1034740	10864770	1.48541e+07	4.84704e+09		0.00804869
29	01:32:26.667000		4754.29		3.7		2.476		1.67215	1423		851		1210973	1.27152e+07	1.7384e+07	5.67257e+09		0.00941952
30	01:39:33.333000		5120		3.88		2.598		1.64748	1603		973		1559719	1.6377e+07	2.23904e+07	7.3062e+09		0.0121322
31	01:46:40		5485.71		3.936		2.64		1.63448	1659		1015		1683885	1.76808e+07	2.41728e+07	7.88783e+09		0.013098
32	01:53:46.667000		5851.43		4.169		2.685		1.78491	1892		1060		2005520	21057960	2.879e+07	9.39447e+09		0.0155999
33	02:00:53.333000		6217.14		4.265		2.728		1.80236	1988		1103		2192764	23024022	3.1478e+07	1.02716e+10		0.0170563
34	02:08:00		6582.86		4.331		2.831		1.70315	2054		1206		2477124	26009802	3.55601e+07	1.16036e+10		0.0192682
35	02:15:06.667000		6948.57		4.499		2.847		1.81833	2222		1222		2715284	28510482	3.89789e+07	1.27192e+10		0.0211208
36	02:22:13.333000		7314.29		4.599		2.934		1.77387	2322		1309		3039498	31914729	4.36332e+07	1.42379e+10		0.0236426
37	02:29:20		7680		4.628		3.011		1.69625	2351		1386		3258486	34214103	4.67768e+07	1.52637e+10		0.025346
38	02:36:26.667000		8045.71		4.768		3.129		1.65625	2491		1504		3746464	39337872	5.37819e+07	1.75496e+10		0.0291418
39	02:43:33.333000		8411.43		4.845		3.165		1.66753	2568		1540		3954720	41524560	5.67715e+07	1.85251e+10		0.0307617
40	02:50:40		8777.14		5.022		3.282		1.65661	2745		1657		4548465	4.77589e+07	6.5295e+07	2.13064e+10		0.0353801
41	02:57:46.667000		9142.86		5.12		3.324		1.67334	2843		1699		4830257	5.07177e+07	6.93402e+07	2.26264e+10		0.037572
42	03:04:53.333000		9508.57		5.152		3.391		1.62797	2875		1766		5077250	53311125	7.28859e+07	2.37834e+10		0.0394932
43	03:12:00		9874.29		5.358		3.415		1.72123	3081		1790		5514990	57907395	7.91698e+07	2.58339e+10		0.0428982
44	03:19:06.667000		10240		5.478		3.579		1.63818	3201		1954		6254754	65674917	8.97894e+07	2.92992e+10		0.0486524
45	03:26:13.333000		10605.7		5.581		3.583		1.68744	3304		1958		6469232	67926936	9.28683e+07	3.03039e+10		0.0503207
46	03:33:20		10971.4		5.761		3.691		1.68635	3484		2066		7197944	75578412	1.03329e+08	3.37174e+10		0.055989
47	03:40:26.667000		11337.1		5.882		3.711		1.72819	3605		2086		7520030	78960315	1.07953e+08	3.52261e+10		0.0584943
48	03:47:33.333000		11702.9		5.968		3.812		1.6877	3691		2187		8072217	8.47583e+07	1.1588e+08	3.78127e+10		0.0627895
49	03:54:40		12068.6		6.151		3.852		1.73956	3874		2227		8627398	90587679	1.2385e+08	4.04134e+10		0.067108
50	04:01:46.667000		12434.3		6.314		3.894		1.7792	4037		2269		9159953	9.61795e+07	1.31495e+08	4.2908e+10		0.0712504
51	04:08:53.333000		12800		6.359		3.926		1.77401	4082		2301		9392682	98623161	1.34836e+08	4.39982e+10		0.0730607
52	04:16:00		13165.7		6.51		4.095		1.71377	4233		2470		1.04555e+07	1.09783e+08	1.50093e+08	4.89768e+10		0.0813279
53	04:23:06.667000		13531.4		6.633		4.138		1.73339	4356		2513		10946628	114939594	1.57143e+08	5.12773e+10		0.085148
54	04:30:13.333000		13897.1		6.76		4.254		1.70521	4483		2629		11785807	1.23751e+08	1.6919e+08	5.52083e+10		0.0916755
55	04:37:20		14262.9		6.95		4.283		1.75809	4673		2658		12420834	130418757	1.78306e+08	5.8183e+10		0.0966151
56	04:44:26.667000		14628.6		7.051		4.377		1.73474	4774		2752		13138048	137949504	1.88602e+08	6.15426e+10		0.102194
57	04:51:33.333000		14994.3		7.157		4.396		1.7611	4880		2771		13522480	141986040	1.9412e+08	6.33434e+10		0.105184
58	04:58:40		15360		7.259		4.51		1.72686	4982		2885		14373070	150917235	2.06331e+08	6.73278e+10		0.1118
59	05:05:46.667000		15725.7		7.429		4.559		1.75596	5152		2934		15115968	158717664	2.16995e+08	7.08078e+10		0.117579
60	05:12:53.333000		16091.4		7.533		4.659		1.73237	5256		3034		15946704	167440392	2.28921e+08	7.46992e+10		0.124041
61	05:20:00		16457.1		7.709		4.692		1.77111	5432		3067		16659944	174929412	2.3916e+08	7.80403e+10		0.129589
62	05:27:06.667000		16822.9		7.782		4.8		1.73386	5505		3175		17478375	1.83523e+08	2.50909e+08	8.1874e+10		0.135955
63	05:34:13.333000		17188.6		7.835		4.812		1.74396	5558		3187		17713346	185990133	2.54282e+08	8.29747e+10		0.137783
64	05:41:20		17554.3		8.031		4.944		1.73365	5754		3319		1.90975e+07	2.00524e+08	2.74152e+08	8.94586e+10		0.14855
65	05:48:26.667000		17920		8.063		4.944		1.7433	5786		3319		1.92037e+07	2.01639e+08	2.75677e+08	8.99561e+10		0.149376
66	05:55:33.333000		18285.7		8.227		5.07		1.72714	5950		3445		20497750	215226375	2.94253e+08	9.60177e+10		0.159441
67	06:02:40		18651.4		8.326		5.092		1.74474	6049		3467		20971883	2.20205e+08	3.01059e+08	9.82387e+10		0.163129
68	06:09:46.667000		19017.1		8.45		5.193		1.7301	6173		3568		22025264	231265272	3.16181e+08	1.03173e+11		0.171323
69	06:16:53.333000		19382.9		8.603		5.204		1.76753	6326		3579		22640754	237727917	3.25017e+08	1.06056e+11		0.17611
70	06:24:00		19748.6		8.643		5.327		1.71961	6366		3702		23566932	247452786	3.38312e+08	1.10395e+11		0.183315
71	06:31:06.667000		20114.3		8.883		5.338		1.77915	6606		3713		24528078	257544819	3.5211e+08	1.14897e+11		0.190791
72	06:38:13.333000		20480		8.936		5.461		1.73592	6659		3836		25543924	268211202	3.66693e+08	1.19656e+11		0.198693
73	06:45:20		20845.7		9.013		5.474		1.75006	6736		3849		25926864	272232072	3.7219e+08	1.21449e+11		0.201671
74	06:52:26.667000		21211.4		9.137		5.547		1.74911	6860		3922		26904920	282501660	3.8623e+08	1.26031e+11		0.209279
75	06:59:33.333000		21577.1		9.203		5.585		1.74899	6926		3960		27426960	287983080	3.93724e+08	1.28476e+11		0.21334
76	07:06:40		21942.9		9.341		5.585		1.78384	7064		3960		27973440	293721120	4.01569e+08	1.31036e+11		0.217591
77	07:13:46.667000		22308.6		9.485		5.585		1.8202	7208		3960		28543680	299708640	4.09755e+08	1.33707e+11		0.222026
78	07:20:53.333000		22674.3		9.601		5.726		1.78591	7324		4101		30035724	315375102	4.31174e+08	1.40696e+11		0.233632
79	07:28:00		23040		9.664		5.752		1.78992	7387		4127		30486149	3.20105e+08	4.3764e+08	1.42806e+11		0.237136
80	07:35:06.667000		23405.7		9.891		5.925		1.7707	7614		4300		32740200	343772100	4.69998e+08	1.53365e+11		0.254669
