# Supplementary material for: Crystal surface defects as possible origins of cocrystal dissociation
Source: Royal Society of Chemistry journal article supplement (doi:10.1039/d2ce00166g), 2022-01-01
Supplement: d2ce00166g4.xlsx [file d2ce00166g4.xlsx]

## Sheet: Sheet1
Frame		Second		Long Axis	Short axis		Long Axis (nm)	Short Axis (nm)
0		0		1.677	1.095		0	0
1		256		1.728	1.113		51	18
2		512		1.733	1.122		56	27
3		768		1.804	1.163		127	68
4		1024		1.805	1.17		128	75
5		1280		1.869	1.204		192	109
6		1536		1.918	1.208		241	113
7		1792		1.926	1.237		249	142
8		2048		1.982	1.263		305	168
9		2304		1.987	1.291		310	196
10		2560		2.012	1.306		335	211
11		2816		2.115	1.332		438	237
12		3072		2.117	1.334		440	239
13		3328		2.129	1.356		452	261
14		3584		2.147	1.382		470	287
15		3840		2.165	1.413		488	318
16		4096		2.17			493
17		4352		2.22			543
18		4608		2.281			604
19		4864		2.289			612
20		5120		2.33			653
21		5376		2.363			686
22		5632		2.378			701
23		5888		2.383			706
