# Supplementary material for: Crystal surface defects as possible origins of cocrystal dissociation
Source: Royal Society of Chemistry journal article supplement (doi:10.1039/d2ce00166g), 2022-01-01
Supplement: d2ce00166g5.xlsx [file d2ce00166g5.xlsx]

## Sheet: Sheet1
Frame	Second		Long axis (MicroM)	Short axis(MicroM)		Long axis (nm)		Short axis(nm)				Second		Long axis (MicroM)		Short axis(MicroM)		Long axis (nm)		Short axis(nm)
0	0		2.058	1.235		0		0
1	365.714		3.802	2.427		1744		1192						(2nd growth unit)
2	731.429		4.443	2.915		2385		1680				0		0.402		0.263		0		0
3	1097.14		5.967	3.88		3909		2645				365.714		1.887		1.173		1485		910
4	1462.86		6.643	3.901		4585		2666				731.429		2.333		1.42		1931		1157
5	1828.57		8.082	3.913		6024		2678				1097.14		3.633		2.302		3231		2039
6	2194.29		8.773	4.022		6715		2787				1462.86		4.082		2.727		3680		2464
7			(1st growth unit)									1828.57		5.382		3.631		4980		3368
8												2194.29		5.849		4.001		5447		3738
