# Supplementary material for: Crystal surface defects as possible origins of cocrystal dissociation
Source: Royal Society of Chemistry journal article supplement (doi:10.1039/d2ce00166g), 2022-01-01
Supplement: d2ce00166g6.xlsx [file d2ce00166g6.xlsx]

## Sheet: Upper layer
Frame	Time	Second		Long axis	Short axis		Long axis (nm)	Short axis (nm)
0		0		3.507	2.168		0	0
1		425.957		3.968	2.293		461	125
2		851.913		4.406	2.517		899	349
3		1277.87		4.579	2.666		1072	498
4		1703.83		5.096	2.991		1589	823
5		2129.78			2.995			827
6		2555.74
7		2981.7
8		3407.65
9		3833.61

## Sheet: Next upper layer
Frame		Second		Long axis	Short axis		Long axis (nm)	Short axis (nm)
20		0		1.08	0.772		0	0
21		425.957		1.185	0.941		105	169
22		851.913		1.989	1.206		909	434
23		1277.87		2.176	1.296		1096	524
24		1703.83		2.834	1.569		1754	797
25		2129.78		3.013	1.721		1933	949
26		2555.74		3.609	1.983		2529	1211
27		2981.7		3.628	2.068		2548	1296
28		3407.65			2.458			1686
29		3833.61			2.477			1705
30		4259.57			2.744			1972
31		4685.52			2.825			2053
32		5111.48			3.188			2416
33		5537.44			3.256			2484
34		5963.39			3.595			2823
35		6389.35			3.709			2937
36		6815.31			4.121			3349

## Sheet: 3rd upper layer
Frame		Second		Long axis	Short axis		Long axis (nm)	Short axis (nm)
48		0		0.58	0.41		0	0
49		425.957		0.744	0.605		164	195
50		851.913		1.245	0.768		665	358
51		1277.87		1.405	0.886		825	476
52		1703.83		1.824	1.209		1244	799
53		2129.78		1.915	1.217		1335	807
54		2555.74		2.563	1.622		1983	1212
55		2981.7		2.655	1.641		2075	1231
56		3407.65		3.04	1.907		2460	1497
57		3833.61		3.16	2.031		2580	1621
58		4259.57		3.747	2.166		3167	1756
59		4685.52		3.818	2.24		3238	1830
60		5111.48		4.327	2.542		3747	2132
61		5537.44		4.362	2.589		3782	2179
62		5963.39		4.79	2.821		4210	2411
63		6389.35		4.805	2.827		4225	2417
64		6815.31		5.326	3.072		4746	2662
65		7241.26		5.289	3.126		4709	2716
66		7667.22		5.787	3.464		5207	3054
67		8093.18		5.816	3.478		5236	3068
68		8519.13		6.094	3.669		5514	3259

## Sheet: Lower layer
Frame		Second		Long axis	Short axis		Long axis (nm)	Short axis (nm)
0		0		3.342	1.715		0	0
1		425.957		3.596	1.789		254	74
2		851.913		4.002	1.992		660	277
3		1277.87		4.254	2.091		912	376
4		1703.83		5.014	2.28		1672	565
5		2129.78		5.179	2.441		1837	726
6		2555.74		5.771	2.692		2429	977
7		2981.7		6.065	2.83		2723	1115
8		3407.65		6.681	2.968		3339	1253
9		3833.61		6.923	3.083		3581	1368
10		4259.57		7.521	3.233		4179	1518
11		4685.52		7.664	3.424		4322	1709
12		5111.48		8.337	3.628		4995	1913
13		5537.44		8.508	3.691		5166	1976
14		5963.39		9.314	3.862		5972	2147

## Sheet: Next lower layer
Frame		Second		Long axis	Short axis		Long axis (nm)	Short axis (nm)
15		0		0.669	0.489		0	0
16		425.957		1.333	0.692		664	203
17		851.913		1.498	0.763		829	274
18		1277.87		2.101	0.965		1432	476
19		1703.83		2.255	1.087		1586	598
20		2129.78		2.9	1.391		2231	902
21		2555.74		3.01	1.578		2341	1089
22		2981.7		3.676	1.754		3007	1265
23		3407.65		3.74	1.818		3071	1329
24		3833.61		4.408	2.017		3739	1528
25		4259.57		4.516	2.092		3847	1603
26		4685.52		5.148	2.342		4479	1853
27		5111.48		5.17	2.37		4501	1881
28		5537.44		5.858	2.656		5189	2167
29		5963.39		5.923	2.78		5254	2291
30		6389.35		6.424	2.995		5755	2506
31		6815.31		6.459	3.031		5790	2542
32		7241.26		7.131	3.294		6462	2805
33		7667.22		7.177	3.369		6508	2880
34		8093.18		7.761	3.508		7092	3019
35		8519.13		7.794	3.63		7125	3141
36		8945.09		8.366	3.771		7697	3282
37		9371.05		8.445	3.858		7776	3369
